# Supplementary material
Source: PubMed Central journal article supplement (PMC8756470)
Supplement: sj-pdf-1-jcb-10.1177_0271678X211021313.pdf [file sj-pdf-1-jcb-10.1177_0271678X211021313.pdf]

# SUPPLEMENTARY MATERIALS

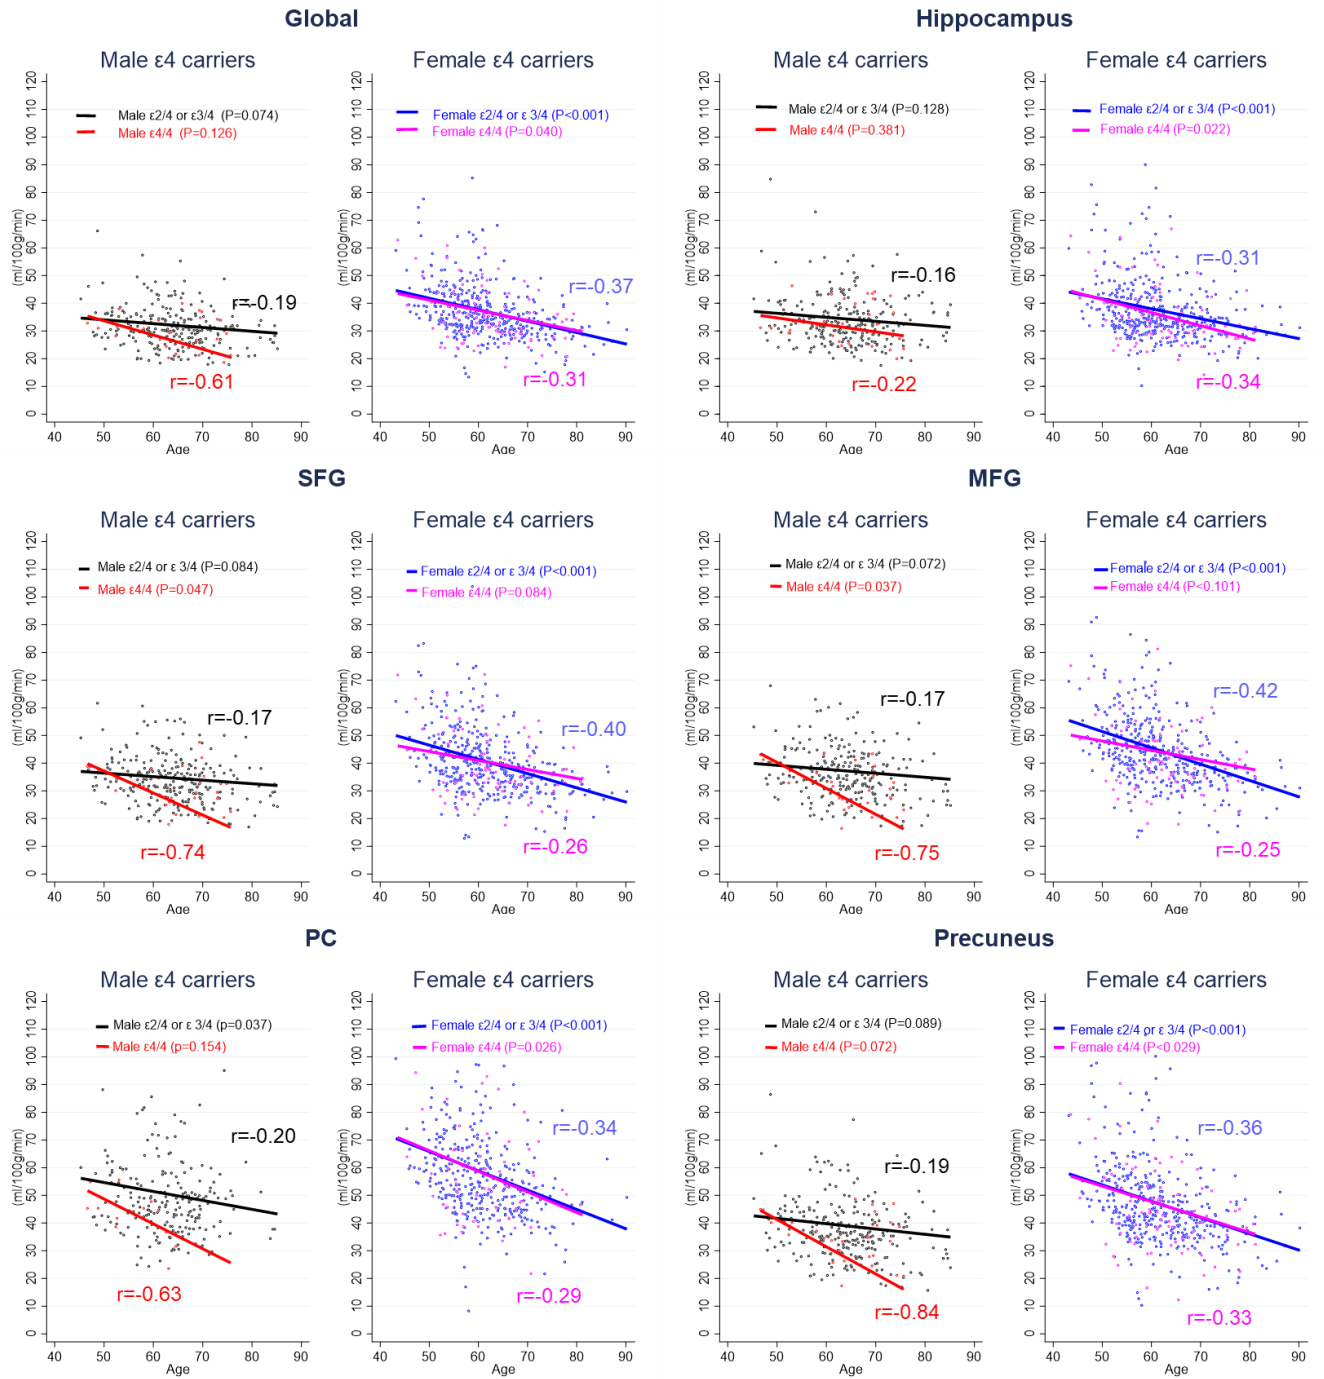

**Supplementary Figure 1.** Cerebral perfusion trajectories among *APOE* ε4 carriers by sex and *APOE* isoform

SFG=Superior frontal gyrus, MFG=middle frontal gyrus, PC=Posterior cingulate

*Notes.* There were 132 male ε2/4 or ε3/4 carriers, 225 female ε2/4 or ε3/4 carriers, 22 male ε4/4 carriers, and 46 female ε4/4 carriers.

**Supplementary Table 1.** Association between age-related cerebral perfusion change and time-varying cardiometabolic measurements

|                                 | Gray matter <sup>a</sup> | Hippocampus <sup>a</sup> | Superior frontal<br>gyrus <sup>a</sup> | Middle frontal gyrus <sup>a</sup> | Posterior cingulate <sup>a</sup> | Precuneus <sup>a</sup> |
|---------------------------------|--------------------------|--------------------------|----------------------------------------|-----------------------------------|----------------------------------|------------------------|
| Systolic blood pressure (n=881) | -0.08 (-0.10, -0.05)**   | -0.08 (-0.12, -0.05)**   | -0.08 (-0.11, -0.04)**                 | -0.09 (-0.13, -0.05)**            | -0.13 (-0.19, -0.08)**           | -0.09 (-0.13, -0.04)** |
| Body mass index (n=881)         | -0.34 (-0.43, -0.25)**   | -0.34 (-0.44, -2.06)**   | -3.09 (-3.62, -2.56)**                 | -0.44 (-0.55, -0.32)**            | -0.58 (-0.76, -0.41)**           | -0.47 (-0.61, -0.34)** |
| Blood glucose (n=822)           | -0.07 (-0.10, -0.04)**   | -0.06 (-0.10, -0.03)**   | -0.09 (-0.12, -0.05)**                 | -0.10 (-0.13, -0.06)**            | -0.12 (-0.18, -0.06)**           | -0.11 (-0.15, -0.07)** |
| Total cholesterol (n=883)       | -1.07 (-1.57, -2.02)**   | -0.96 (-1.54, -0.38)**   | -1.18 (-1.76, -0.59)**                 | 0.00 (0.00, 0.01)                 | 0.01 (0.00, 0.02)                | 0.01 (0.00, 0.01)      |

<sup>a</sup>  $\beta$ -coefficients and 95% confidence intervals in models were adjusted for birth cohort, sex, APOE  $\epsilon$ 4 status, education, parental history of dementia, smoking status, intracranial volume, post-labeling delay, and head coil.

<sup>†</sup>0.05 <  $P$  < 0.1; \*0.01 <  $P$  < 0.05; \*\* $P$  < 0.01.

**Supplementary Table 2.** Association of cerebral perfusion with age, sex, and *APOE*  $\epsilon 4$  status among participants with a 2025 ms post-labeling delay cerebral perfusion (n=876)

|                                                                | Total Gray matter <sup>a</sup> | Hippocampus <sup>a</sup>  | Superior frontal gyrus <sup>a</sup> | Middle frontal gyrus <sup>a</sup>   | Posterior cingulate <sup>a</sup> | Precuneus <sup>a</sup>      |
|----------------------------------------------------------------|--------------------------------|---------------------------|-------------------------------------|-------------------------------------|----------------------------------|-----------------------------|
| <b><i>Linear model, 5-yrs</i></b>                              |                                |                           |                                     |                                     |                                  |                             |
| Age, 5-year                                                    | -1.11**<br>(-1.47, -0.74)      | -0.98**<br>(-1.35, -0.61) | -1.32**<br>(-1.74, -0.91)           | -1.54**<br>(-2.01, -1.07)           | -2.46**<br>(-3.26, -1.67)        | -2.14**<br>(-2.76, -1.62)   |
| <b><i>Categorical age</i></b>                                  |                                |                           |                                     |                                     |                                  |                             |
| Age groups                                                     |                                |                           |                                     |                                     |                                  |                             |
| 40-49                                                          | Ref.                           | Ref.                      | Ref.                                | Ref.                                | Ref.                             | Ref.                        |
| 50-59                                                          | -2.84**<br>(-4.66, -1.02)      | -3.00**<br>(-5.06, -0.95) | -2.80**<br>(-4.78, -0.82)           | -3.01**<br>(-5.15, -0.87)           | -5.76**<br>(-9.16, -2.36)        | -4.95**<br>(-7.63, -2.26)   |
| 60-69                                                          | -3.82**<br>(-5.86, -1.78)      | -3.89**<br>(-6.14, -1.63) | -4.26**<br>(-6.50, -2.01)           | -4.59**<br>(-7.05, -2.13)           | -7.99**<br>(-12.00, -3.99)       | -7.40**<br>(-10.57, -4.23)  |
| ≥70                                                            | -5.69**<br>(-8.09, -3.28)      | -5.61**<br>(-8.20, -3.02) | -6.28**<br>(-8.99, -3.58)           | -6.96**<br>(-9.96, -3.96)           | -11.68**<br>(-16.66, -6.69)      | -10.46**<br>(-14.43, -6.50) |
| <b><i>Annual change rate of cerebral perfusion (Slope)</i></b> |                                |                           |                                     |                                     |                                  |                             |
| Male <i>APOE</i> non- $\epsilon 4$                             | -1.44**<br>(-2.07, -0.80)      | -1.35**<br>(-2.02, -0.67) | -1.60**<br>(-2.30, -0.89)           | -1.92**<br>(-2.71, -1.13)           | -2.83**<br>(-4.19, -1.46)        | -2.33**<br>(-3.39, -1.26)   |
| Male <i>APOE</i> $\epsilon 4$                                  | -0.56<br>(-1.38, 0.27)         | -0.35<br>(-1.23, 0.53)    | -0.77 <sup>†</sup><br>(-1.68, 0.14) | -0.85 <sup>†</sup><br>(-1.87, 0.17) | -1.47<br>(-3.14, 0.20)           | -0.96<br>(-2.26, 0.34)      |
| Female <i>APOE</i> non- $\epsilon 4$                           | -1.16**<br>(-1.66, -0.67)      | -1.01**<br>(-1.52, -0.49) | -1.33**<br>(-1.88, -0.77)           | -1.55**<br>(-2.17, -0.93)           | -2.41**<br>(-3.47, -1.35)        | -2.30**<br>(-3.12, -1.47)   |
| Female <i>APOE</i> $\epsilon 4$                                | -1.97**<br>(-3.13, -0.81)      | -1.91**<br>(-3.15, -0.67) | -2.27**<br>(-3.55, -1.00)           | -2.79**<br>(-4.21, -1.36)           | -4.37**<br>(-6.77, -1.98)        | -4.00**<br>(-5.86, -2.13)   |

<sup>a</sup>The  $\beta$ -coefficients and 95% confidence intervals in the models were adjusted for birth cohort, sex, *APOE*  $\epsilon 4$  status, education, parental history of dementia, smoking status, intracranial volume, and head coil. <sup>†</sup>0.05<*P*<0.1; \*0.01<*P*<0.05; \*\**P*<0.01.

**Supplementary Table 3.** Non-linear associations of cerebral perfusion with age, sex, and *APOE*  $\epsilon$ 4 (n=950)

|                                                        | Gray matter <sup>a</sup>  | Hippocampus <sup>a</sup>  | Superior<br>frontal gyrus <sup>a</sup> | Middle frontal<br>gyrus <sup>a</sup> | Posterior<br>cingulate <sup>a</sup> | Precuneus <sup>a</sup>    |
|--------------------------------------------------------|---------------------------|---------------------------|----------------------------------------|--------------------------------------|-------------------------------------|---------------------------|
| <b><i>Quadratic model</i></b>                          |                           |                           |                                        |                                      |                                     |                           |
| Age, year                                              | -1.47**<br>(-2.29, -0.66) | -1.61**<br>(-2.54, -0.67) | -1.56**<br>(-2.51, -0.60)              | -1.61**<br>(-2.63, -0.59)            | -2.75**<br>(-4.32, -1.18)           | -2.20**<br>(-3.39, -1.00) |
| Age square                                             | 0.01*<br>(0.00, 0.01)     | 0.01*<br>(0.00, 0.02)     | 0.01†<br>(-0.00, 0.01)                 | 0.01†<br>(0.00, 0.01)                | 0.01*<br>(0.00, 0.03)               | 0.01†<br>(0.00, 0.02)     |
| <b>Interaction, Sex</b>                                |                           |                           |                                        |                                      |                                     |                           |
| <b><i>Quadratic model</i></b>                          |                           |                           |                                        |                                      |                                     |                           |
| Age×Sex                                                | -1.02<br>(-2.65, 0.60)    | -0.48<br>(-2.33, 1.36)    | -1.69†<br>(-3.59, 0.22)                | -1.54<br>(-3.58, 0.49)               | -1.88<br>(-5.01, 1.25)              | -1.73<br>(-4.11, 0.65)    |
| Age square ×Sex                                        | 0.01<br>(-0.01, 0.01)     | 0.00<br>(-0.01, 0.02)     | 0.01<br>(-0.00, 0.03)                  | 0.01<br>(-0.01, 0.03)                | 0.01<br>(-0.01, 0.04)               | 0.01<br>(-0.01, 0.03)     |
| <b>Interaction, <i>APOE</i> <math>\epsilon</math>4</b> |                           |                           |                                        |                                      |                                     |                           |
| <b><i>Quadratic model</i></b>                          |                           |                           |                                        |                                      |                                     |                           |
| Age× $\epsilon$ 4                                      | -1.35†<br>(-2.90, 0.20)   | -1.43<br>(-3.20, 0.34)    | -1.37<br>(-3.19, 0.45)                 | -1.33<br>(-3.27, 0.62)               | -2.95†<br>(-5.94, 0.04)             | -1.81<br>(-4.09, 0.46)    |
| Age square × $\epsilon$ 4                              | 0.01†<br>(-0.00, 0.02)    | 0.01<br>(-0.00, 0.03)     | 0.01<br>(-0.00, 0.03)                  | 0.01<br>(0.00, 0.03)                 | 0.02*<br>(0.00, 0.05)               | 0.02<br>(0.00, 0.03)      |

<sup>a</sup>  $\beta$ -coefficients and 95% confidence intervals in models were adjusted for birth cohort, sex, *APOE*  $\epsilon$ 4 status, education, parental history of dementia, smoking status, intracranial volume, post-labeling delay, and head coil.

†0.05<*P*<0.1; \*0.01<*P*<0.05; \*\**P*<0.01.

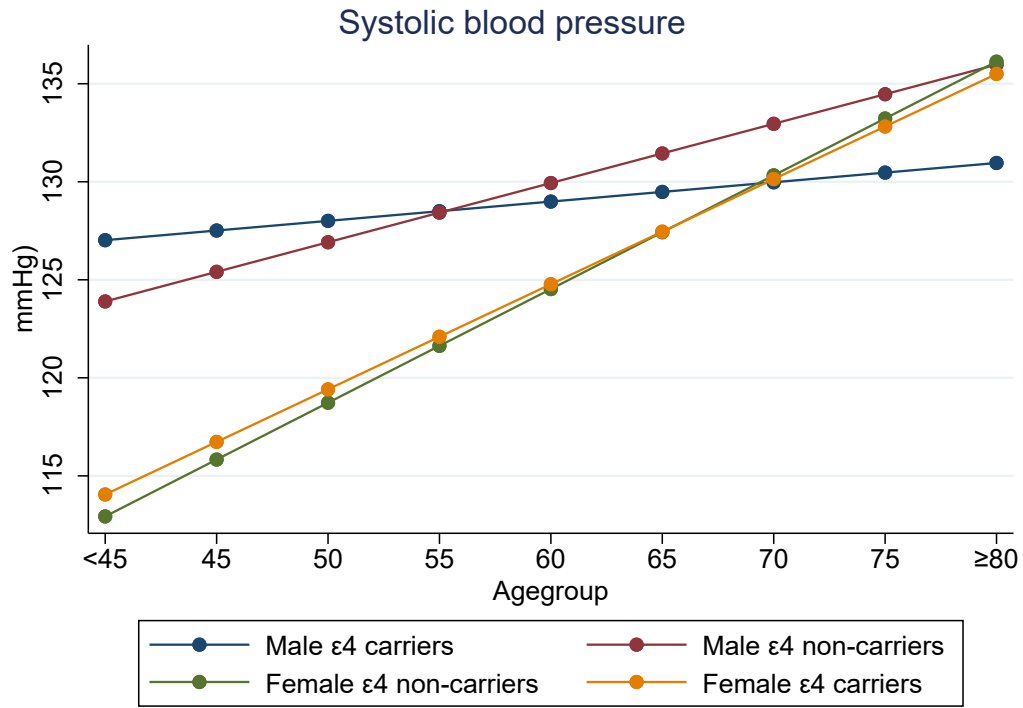

**Supplementary Figure 2.** The association between systolic blood pressure and age by *APOE* ε4 status and sex (n=876)
